# Supplementary material for: Detection of antimicrobial resistance genes in Lactobacillus spp. from poultry probiotic products and their horizontal transfer among Escherichia coli
Source: PubMed Central journal article supplement — Vet Anim Sci. 2023 Mar 10;20:100292. doi: 10.1016/j.vas.2023.100292 (PMC10024139; doi:10.1016/j.vas.2023.100292), 2023-03-10

**Supplementary Table 1.** Composition of probiotic products with viable counts

| Brand name | Origin of the product | Name of organisms                 | Viable count (cfu/gm)     |
|------------|-----------------------|-----------------------------------|---------------------------|
| Brand 1    | USA                   | <i>Lactobacillus acidophilus</i>  | 6×10 <sup>10</sup> cfu/kg |
|            |                       | <i>Bacillus subtilis</i>          |                           |
|            |                       | <i>Bifidobacterium longum</i>     |                           |
| Brand 2    | India                 | <i>Lactobacillus acidophilus</i>  | 4×10 <sup>8</sup>         |
|            |                       | <i>Bacillus subtilis</i>          | 1×10 <sup>9</sup>         |
|            |                       | <i>Pediococcus acidilactici</i>   | 1×10 <sup>8</sup>         |
|            |                       | <i>Saccharomyces cerevisiae</i>   | 1×10 <sup>8</sup>         |
|            |                       | <i>Streptomyces spp.</i>          | 5×10 <sup>7</sup>         |
| Brand 3    | Austria               | <i>Lactobacillus acidophilus</i>  | 2×10 <sup>9</sup>         |
|            |                       | <i>Lactobacillus bulgaricus</i>   |                           |
|            |                       | <i>Lactobacillus rhamnosus</i>    |                           |
|            |                       | <i>Lactobacillus plantarum</i>    |                           |
|            |                       | <i>Bifidobacterium bifidum</i>    |                           |
|            |                       | <i>Streptococcus thermophilus</i> |                           |
|            |                       | <i>Enterococcus faecium</i>       |                           |
| Brand 4    | Korea                 | <i>Lactobacillus acidophilus</i>  | 6×10 <sup>9</sup>         |
|            |                       | <i>Bifidobacterium bifidum</i>    | 1×10 <sup>9</sup>         |
|            |                       | <i>Saccharomyces boulardii</i>    | 2×10 <sup>9</sup>         |
|            |                       | <i>Aspergillus oryzae</i>         | 1×10 <sup>9</sup>         |
| Brand 5    | UK                    | <i>Lactobacillus acidophilus</i>  | 7×10 <sup>9</sup>         |
|            |                       | <i>Lactobacillus plantarum</i>    |                           |
|            |                       | <i>Bacillus subtilis</i>          | 3×10 <sup>9</sup>         |
|            |                       | <i>Enterococcus faecium</i>       | 1×10 <sup>2</sup>         |
| Brand 6    | Taiwan                | <i>Lactobacillus acidophilus</i>  | 5×10 <sup>12</sup>        |
|            |                       | <i>Lactobacillus reuteri</i>      | 5×10 <sup>12</sup>        |
|            |                       | <i>Lactobacillus salivarius</i>   | 5×10 <sup>12</sup>        |
|            |                       | <i>Enterococcus faecium</i>       | 5×10 <sup>12</sup>        |
|            |                       | <i>Pediococcus acidilactici</i>   | 5×10 <sup>12</sup>        |
| Brand 7    | China                 | <i>Lactobacillus acidophilus</i>  | Not specified             |
|            |                       | <i>Lactobacillus plantarum</i>    | Not specified             |
|            |                       | <i>Bacillus subtilis</i>          | Not specified             |
|            |                       | <i>Bacillus licheniformis</i>     | 2×10 <sup>8</sup>         |
|            |                       | <i>Saccharomyces cerevisiae</i>   | 2×10 <sup>8</sup>         |

**Supplementary Table 2.** List of antimicrobials used for antimicrobial susceptibility testing

| SN | Antimicrobial classes             | Antimicrobial agents | Disc <sup>§</sup> content (µg) | Interpretation criteria used |
|----|-----------------------------------|----------------------|--------------------------------|------------------------------|
| 1  | Penicillin                        | Penicillin-G (P)     | 10 units                       | EUCAST                       |
|    |                                   | Ampicillin (AM)      | 10                             | EUCAST                       |
|    |                                   | Amoxicillin (AX)     | 10                             | CLSI                         |
|    |                                   | Oxacillin (OX)       | 1                              | EUCAST                       |
| 2  | Cephalosporin                     | Cefuroxime (CXM)     | 30                             | EUCAST                       |
|    |                                   | Cefotaxime (CTX)     | 30                             | EUCAST                       |
|    |                                   | Cefepime (FEP)       | 30                             | EUCAST                       |
|    |                                   | Cefepime (FEP)       | 30                             | EUCAST                       |
| 3  | Cephameycins                      | Cefoxitin (FOX)      | 30                             | EUCAST                       |
| 4  | Fluoroquinolones                  | Nalidixic acid (NA)  | 30                             | CLSI                         |
|    |                                   | Ciprofloxacin (CIP)  | 5                              | CLSI                         |
|    |                                   | Levofloxacin (LEV)   | 5                              | CLSI                         |
|    |                                   | Ofloxacin (OFX)      | 5                              | EUCAST                       |
| 5  | Carbapenem                        | Meropenem (MEM)      | 10                             | EUCAST                       |
| 6  | Tetracycline                      | Tetracycline (TE)    | 30                             | CLSI                         |
| 7  | Macrolides                        | Erythromycin (E)     | 15                             | CLSI                         |
| 8  | Glycopeptide and lipoglycopeptide | Vancomycin (VA)      | 30                             | CLSI                         |
| 9  | Lincosamides                      | Clindamycin (DA)     | 2                              | CLSI                         |
| 10 | Oxazolidinone                     | Linezolid (LNZ)      | 30                             | EUCAST                       |

<sup>§</sup>The antimicrobial discs were purchased from Biomaxima, Poland.

**Supplementary Table 3.** Oligonucleotide primers used for the detection of  $\beta$ -lactamase (BSBL, and ESBL), PMQR and tetracycline resistance genes

| Genes                         | Primers                | Sequences<br>5'→3'                              | Size<br>(bp) | References                    |
|-------------------------------|------------------------|-------------------------------------------------|--------------|-------------------------------|
| BSBL-encoding genes           |                        |                                                 |              |                               |
| <i>bla</i> TEM                | TEM-410F<br>TEM-781R   | GGTCGCCGCATACACTATTCTC<br>TTTATCCGCCTCCATCCAGTC | 372          | (Le et al.,<br>2015)          |
| <i>bla</i> SHV                | SHV-287F<br>SHV-517R   | CCAGCAGGATCTGGTGGACTAC<br>CCGGGAAGCGCCTCAT      | 231          |                               |
| ESBL-encoding genes           |                        |                                                 |              |                               |
| <i>bla</i> CTX-M-1            | ctxm1-15F<br>ctxm1-02R | GAATTAGAGCGGCAGTCGGG<br>CACAACCCAGGAAGCAGGC     | 588          |                               |
| <i>bla</i> CTX-M-2            | ctxm2-39F<br>ctxm2-45R | GATGGCGACGCTACCCC<br>CAAGCCGACCTCCCGAAC         | 107          |                               |
| PMQR-encoding genes           |                        |                                                 |              |                               |
| <i>qnr</i> A                  | qnrA-F<br>qnrA-R       | ATTTCTCACGCCAGGATTTG<br>GATCGGCAAAGGTTAGGTCA    | 516          | (Robicsek<br>et al.,<br>2006) |
| <i>qnr</i> B                  | qnrB-F<br>qnrB-R       | GATCGTGAAAGCCAGAAAGG<br>ACGATGCCTGGTAGTTGTCC    | 469          |                               |
| <i>qnr</i> S                  | qnrS-F<br>qnrS-R       | ACGACATTCGTCAACTGCAA<br>TAAATTGGCACCTGTAGGC     | 417          |                               |
| Tetracycline resistance genes |                        |                                                 |              |                               |
| <i>tet</i> A                  | tetA-L<br>tetA-R       | GGCGGTCTTCTTCATCATGC<br>CGGCAGGCAGAGCAAGTAGA    | 502          | (Goswami<br>et al.,<br>2008)  |
| <i>tet</i> B                  | tetBGK-L2<br>tetBGK-R2 | CGCCCAGTGCTGTTGTTGTC<br>CGCGTTGAGAAGCTGAGGTG    | 173          |                               |

BSBL = Broad-spectrum  $\beta$ -lactamase; ESBL = Extended-spectrum  $\beta$ -lactamase; PMQR = Plasmid-mediated quinolones resistance.



**Supplementary Fig. 1.** Round, creamy white colonies of *Lactobacillus* spp. on MRS agar.

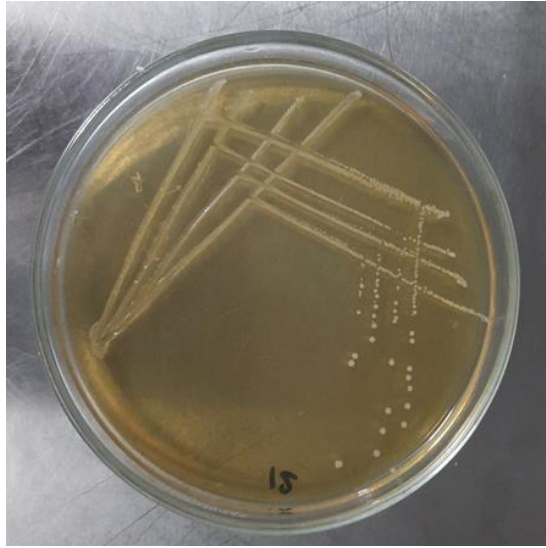

**Supplementary Fig. 2.** PCR amplified products of 247 bp of 16s rRNA gene of *Lactobacillus* spp. on 1.5% agarose gel.

**Legends:** M = DNA marker (100 bp), Lane 1 = Positive control, Lane 2-10 = PCR products of *Lactobacillus* spp. isolates

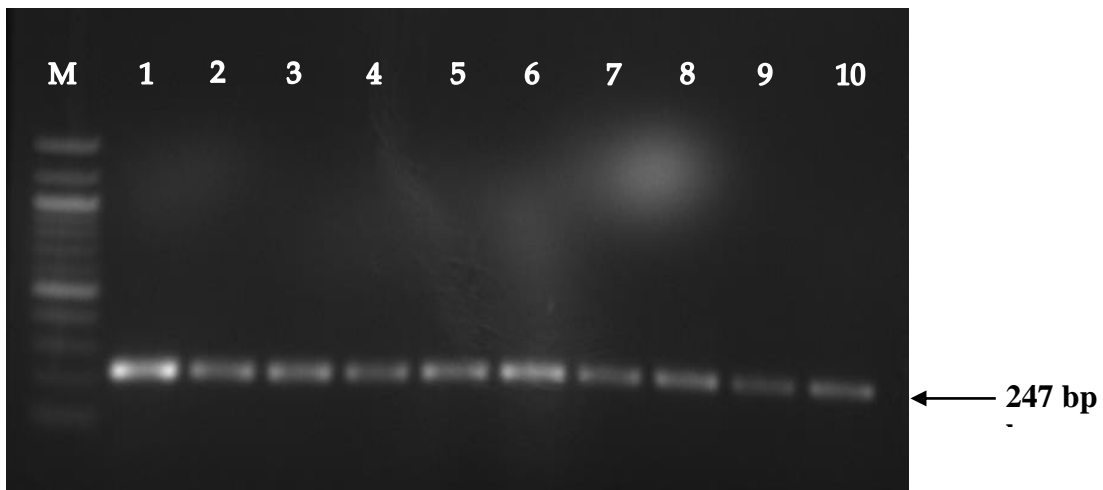

**Supplementary Fig. 3.** Detection of  $\beta$ -lactamase genes (*bla*CTX-M-1, 588 bp; *bla*TEM, 372 bp) in *Lactobacillus* spp. (Lane 5=Ep4) isolated from pharmaceutical products by multiplex PCR.

**Legends:** M = DNA marker (100 bp), Lane 1 = Positive control, Lane 2-9 = PCR products of *Lactobacillus* spp. isolates.

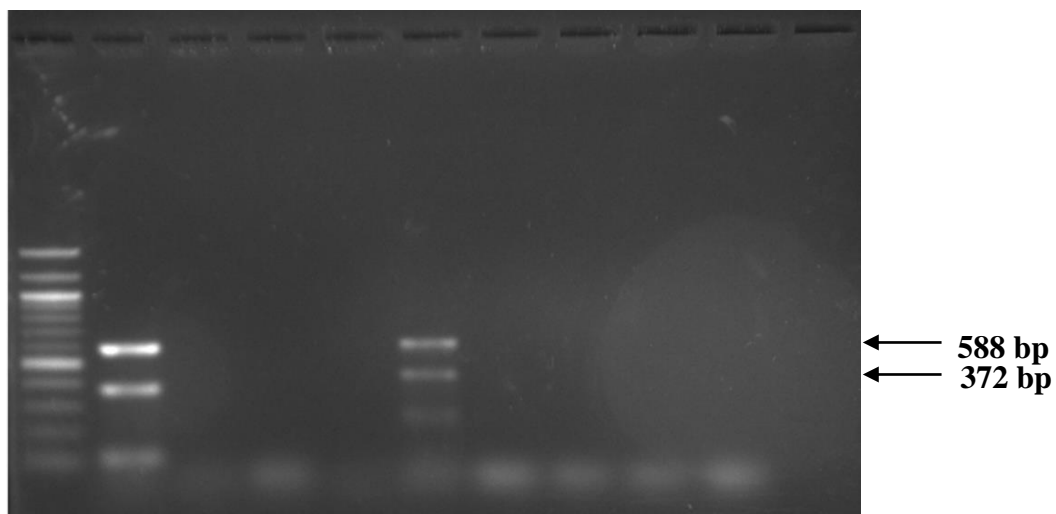

**Supplementary Fig. 4 (a).** Detection of PMQR gene (*qnrS*, 417 bp) in *Lactobacillus* spp. (Lane 5=Ep4) isolated from pharmaceutical products by multiplex PCR.

**Legends:** M = DNA marker (100 bp), Lane 1 = Positive control, Lane 2-11 = PCR products of *Lactobacillus* spp. isolates.

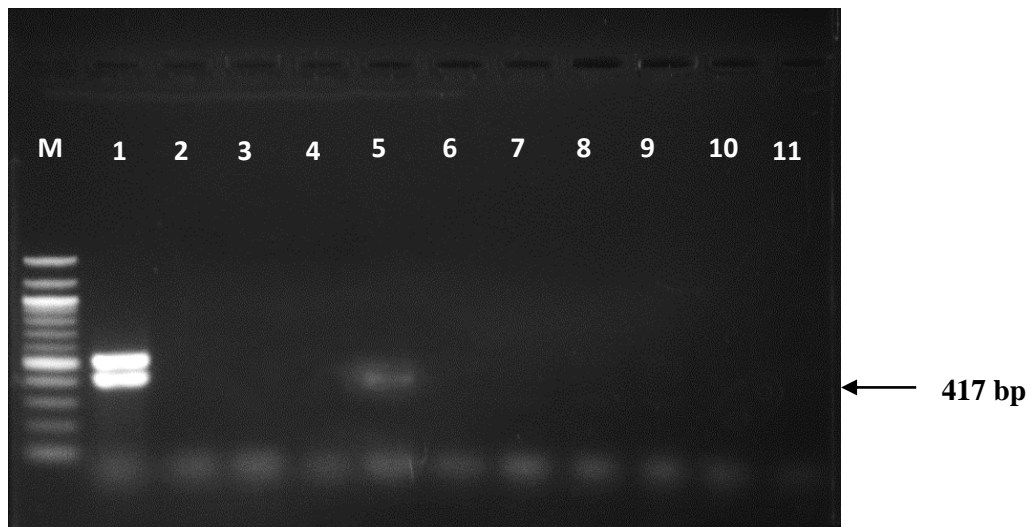



**Supplementary Fig. 4 (b).** Detection of PMQR gene (*qnrS*, 417 bp) in *Lactobacillus* spp. (Lane 9=Pb3, 10=Pb4, 11=Pb5) isolated from pharmaceutical products by multiplex PCR.

**Legends:** M = DNA marker (100 bp), Lane 1 = Positive control, Lane 2-11 = PCR products of *Lactobacillus* spp. isolates.

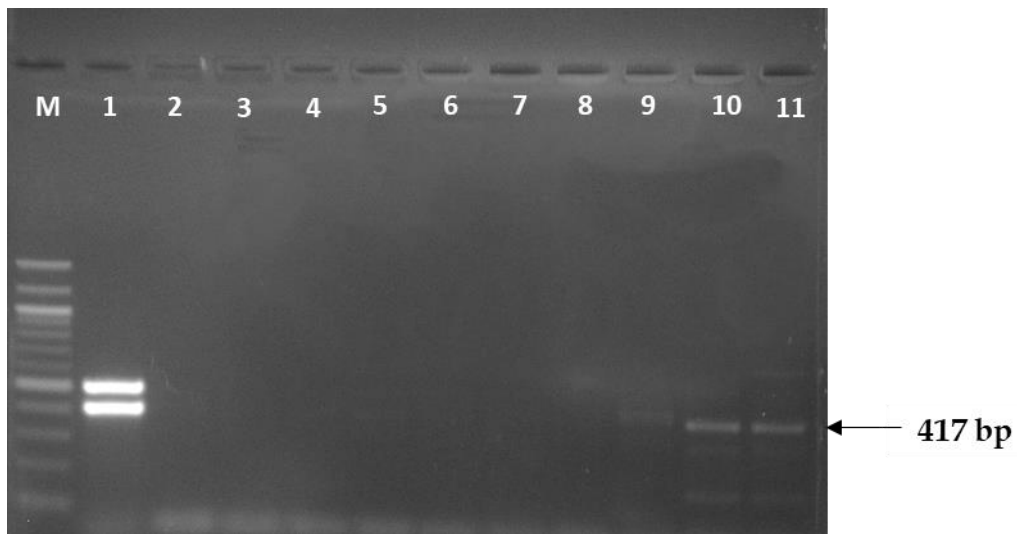

**Supplementary Fig. 5 (a).** Detection of tetracycline resistance gene (*tetA*, 502 bp) in *Lactobacillus* spp. (Lane 5=Ep4) isolated from pharmaceutical products by multiplex PCR.

**Legends:** M = DNA marker (100 bp), Lane 1 = Positive control, Lane 2-11 = PCR products of *Lactobacillus* spp. isolates.

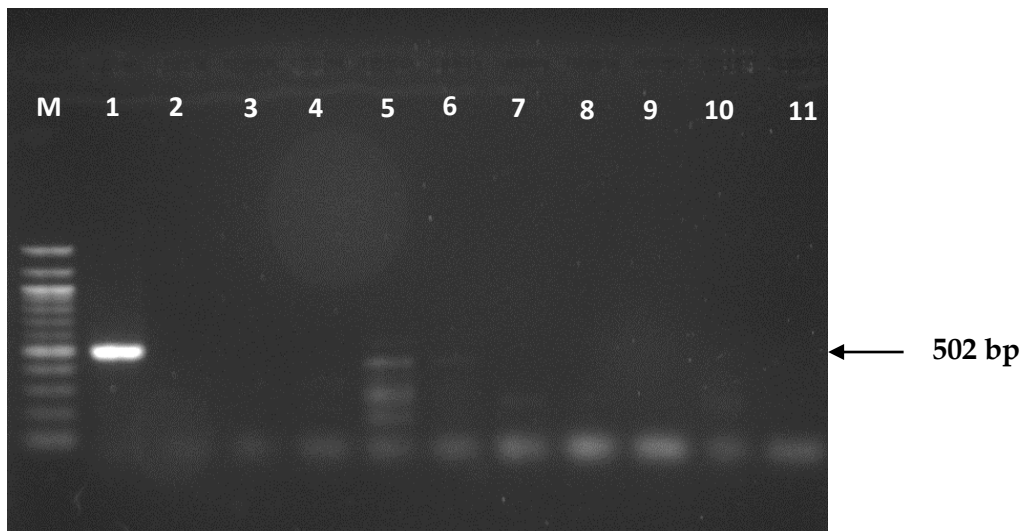

**Supplementary Fig. 5 (b).** Detection of tetracycline resistance genes (*tetB*, 173 bp) in *Lactobacillus* spp. (Lane 10=Pb4, 11=Pb5) isolated from pharmaceutical products by multiplex PCR.

**Legends:** M = DNA marker (100 bp), Lane 1 = Positive control, Lane 2-11 = PCR products of *Lactobacillus* spp. isolates.

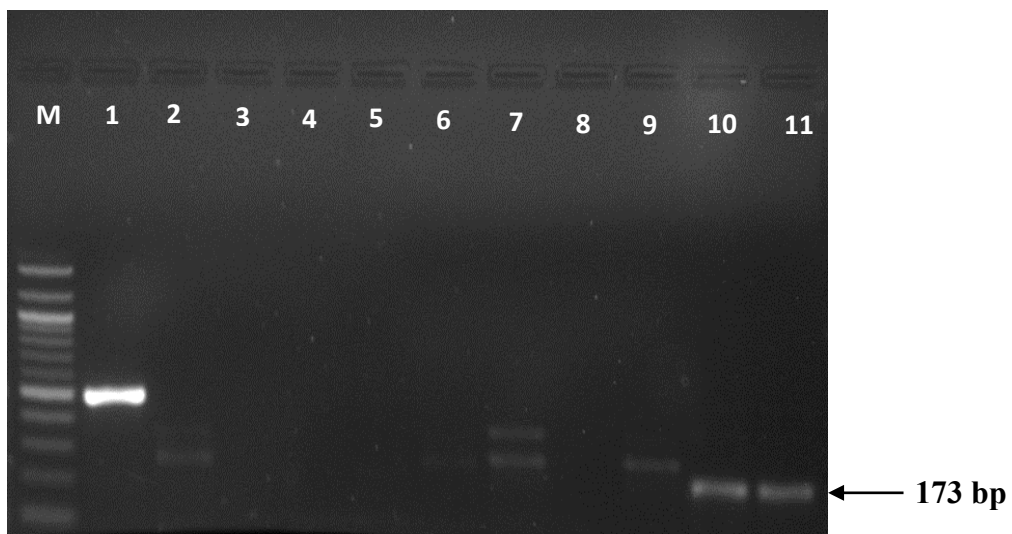

Supplement: mmc1.pdf [file mmc1.pdf]
